# Supplementary material for: The Effects of COVID-19 on Placenta and Pregnancy: What Do We Know So Far?
Source: PubMed Central journal article supplement (PMC7827584; doi:10.3390/diagnostics11010094), 2021-01-08
Supplement: diagnostics-11-00094-s001.pdf [file diagnostics-11-00094-s001.pdf]

Review

# The Effects of COVID-19 on Placenta and Pregnancy: What Do We Know So Far?

Yin Ping Wong <sup>1,\*</sup>, Teck Yee Khong <sup>2</sup> and Geok Chin Tan <sup>1,\*</sup>

<sup>1</sup> Department of Pathology, Faculty of Medicine, Universiti Kebangsaan Malaysia, Jalan Yaacob Latif, Bandar Tun Razak, 56000 Kuala Lumpur, Malaysia

<sup>2</sup> Department of Pathology, SA Pathology, Women's and Children's Hospital, North Adelaide SA 5006, Australia; yee.khong@adelaide.edu.au

\* Correspondence: ypwong@ppukm.ukm.edu.my (Y.P.W.); tangc@ppukm.ukm.edu.my (G.C.T.);

Tel.: +60-391-455-364 (Y.P.W.); +60-391-455-362 (G.C.T)

**Table 1.** Summary of Reports on Clinical Characteristics of SARS-CoV-2 included Studies.

| Authors                       | Number of Cases | Clinical History                                                                                      | Mum tested COVID-19 Positive             | Placenta Sent for SARS-CoV-2 | Placental Morphological Features                                                                                                                                                                                                                                                                                                                                                                                                                                                             | IHC/ISH Findings                                     | Ultrastructural Features                                                     | Fetal Outcomes *                                            |
|-------------------------------|-----------------|-------------------------------------------------------------------------------------------------------|------------------------------------------|------------------------------|----------------------------------------------------------------------------------------------------------------------------------------------------------------------------------------------------------------------------------------------------------------------------------------------------------------------------------------------------------------------------------------------------------------------------------------------------------------------------------------------|------------------------------------------------------|------------------------------------------------------------------------------|-------------------------------------------------------------|
| ** Algarroba et al. 2020 [16] | 1               | 40y/o G3P2, 28 + 4wks' gestation with sepsis pneumonia secondary to severe COVID-19. Delivered via CS | 6 days prior delivery                    | RT-PCR, IHC, TEM (All +ve)   | Gross: 271 g (75–90th percentile)<br>Histo: mature chorionic villi with focal villous oedema, an area of decidual vasculopathy on maternal surface                                                                                                                                                                                                                                                                                                                                           | (IHC) +ve SARS-CoV-2 glycoprotein on placental cells | Virions in syncytiotrophoblast, microvillous and cell process of fibroblasts | BW: 1340 g.<br>Neonate tested -ve                           |
| Algeri et al. 2020 [17]       | 5               | 27 + 4 to 38 + 4wks' gestation, 2 out of 5 with severe COVID-19 Delivered via 4CS, 1VD                | 3 cases +ve on admission, 2 cases +ve PP | Not tested                   | One placenta (38 + 4wk' gestation) sent for histology.<br>Histo: no sign of infection/inflammation                                                                                                                                                                                                                                                                                                                                                                                           | NA                                                   | NA                                                                           | BW: NA.<br>All neonates tested -ve                          |
| Baergen and Heller 2020 [18]  | 20 (1 twins)    | 16–41y/o, 32 + 2–40 + 4wks' gestation. Delivered via 5CS, 15VD                                        | All +ve, Unclear when                    | Not tested                   | Signs of MVM: infarction ( $n = 2$ ), accelerated villous maturation ( $n = 4$ ), intervillous thrombosis ( $n = 1$ ).<br>Signs of FVM: thrombi in fetal circulation ( $n = 3$ ), intramural fibrin ( $n = 7$ ), chorangiomas ( $n = 1$ ), VSK ( $n = 3$ ), avascular villi ( $n = 3$ )<br>Inflammation: chorioamnionitis ( $n = 1$ ), chronic villitis ( $n = 4$ ), fetal vasculitis ( $n = 2$ ). Others: meconium ( $n = 7$ ), cord abnormalities ( $n = 2$ ), chorionic cysts ( $n = 1$ ) | NA                                                   | NA                                                                           | BW: 2072–4115 g, SGA ( $n = 2$ )<br>All neonates tested -ve |

|                               |    |                                                                                           |                       |                       |                                                                                                                                                                                                                                                                                                                                                                                                                                                                                                                                                              |                                                                                                                                                                 |                                                                                                                                                                      |                                                                                     |
|-------------------------------|----|-------------------------------------------------------------------------------------------|-----------------------|-----------------------|--------------------------------------------------------------------------------------------------------------------------------------------------------------------------------------------------------------------------------------------------------------------------------------------------------------------------------------------------------------------------------------------------------------------------------------------------------------------------------------------------------------------------------------------------------------|-----------------------------------------------------------------------------------------------------------------------------------------------------------------|----------------------------------------------------------------------------------------------------------------------------------------------------------------------|-------------------------------------------------------------------------------------|
| ** Baud et al. 2020 [19]      | 1  | 28y/o G1P0, 19wks gestation, with fever in imminent labour. Delivered via VD              | 2 days prior delivery | RT-PCR (+ve)          | Neutrophils and monocytes in the subchorial space, increased intervillous fibrin deposition, and funisitis.                                                                                                                                                                                                                                                                                                                                                                                                                                                  | NA                                                                                                                                                              | NA                                                                                                                                                                   | Stillbirth, BW: NA. Autopsy: no malformation, Neonate, cord blood and AF tested -ve |
| Chen S et al. 2020 [20]       | 3  | 23, 32 and 34y/o, 35–38 + 6wks' gestation. All delivered via CS                           | 1, 2 and 4 days PP    | RT-PCR (-ve)          | Increased intervillous and/or subchorionic fibrin deposition ( $n = 3$ )<br>Increased in villous syncytial nodules ( $n = 2$ )<br>Massive infarction ( $n = 1$ )<br>Chorionic haemangioma ( $n = 1$ )                                                                                                                                                                                                                                                                                                                                                        | NA                                                                                                                                                              | NA                                                                                                                                                                   | Umbilical cords and neonates all tested -ve                                         |
| Chen Siyu et al. 2020 [21]    | 5  | 25–31y/o, 38 + 4–40 + 4wks' gestation                                                     | 0, 1 and 3 days PP    | Not tested            | No significant pathology (No placental infarction and chorionic amniotic inflammation)                                                                                                                                                                                                                                                                                                                                                                                                                                                                       | NA                                                                                                                                                              | NA                                                                                                                                                                   | BW: 3235–4050 g. All neonates tested -ve                                            |
| ** Facchetti et al. 2020 [22] | 15 | 26–44y/o, 32 + 6–41 + 3wks' gestation                                                     | All +ve, Unclear when | IHC, TEM (only 1 +ve) | Signs of MVM: infarction ( $n = 7$ ), increased perivillous fibrin deposition ( $n = 4$ ), accelerated villous maturation ( $n = 5$ ), decidual vasculopathy ( $n = 2$ ), intervillous thrombosis ( $n = 4$ ), subchorial haematoma ( $n = 1$ )<br>Signs of FVM: Chorangiomas ( $n = 4$ ), VSK ( $n = 1$ ), avascular villi ( $n = 1$ ). Inflammation: chorioamnionitis ( $n = 1$ ), villitis ( $n = 1$ ), intervillitis ( $n = 2$ ), acute deciduitis ( $n = 2$ ), choriovasculitis &/ fetal vasculitis ( $n = 2$ )<br>No significant pathology ( $n = 1$ ) | (IHC) +ve SARS-CoV-2 S & N proteins in STs. Monocytes-macrophages & neutrophils (CD11c, CD14, CD68, CD163). Scattered CD3+ lymphocytes. PD-L1 weak-moderate +ve | SARS-CoV-2 in villous syncytiotrophoblast, Hofbauer cells, fetal endothelial capillary cells & intravascular mononuclear cells, fibroblasts, in maternal macrophages | BW: 1499–4150 g. One neonate tested +ve                                             |
| ** Ferraiolo et al. 2020 [23] | 1  | 30y/o, G1P0, 38 + 3wks' gestation, asymptomatic. Delivered via CS for breech presentation | +ve PP                | RT-PCR (+ve)          | Gross: Mild subchorionic fibrin deposition & a single ischaemic area in chorionic disc, slightly hyperspiralised umbilical cord. Histo: signs of villous delayed maturation, focal microchorangiomas, moderate fibrin deposition, villous agglutination, intervillous thrombosis                                                                                                                                                                                                                                                                             | NA                                                                                                                                                              | NA                                                                                                                                                                   | BW: NA Neonate tested -ve                                                           |

|                            |    |                                                                                                                                              |                                   |                   |                                                                                                                                                                                                                                                                                                                                                                                                                                                                                                                                                                                                                                                                                                      |                                                                                                                                                                                                                                  |                                                           |                                                                          |
|----------------------------|----|----------------------------------------------------------------------------------------------------------------------------------------------|-----------------------------------|-------------------|------------------------------------------------------------------------------------------------------------------------------------------------------------------------------------------------------------------------------------------------------------------------------------------------------------------------------------------------------------------------------------------------------------------------------------------------------------------------------------------------------------------------------------------------------------------------------------------------------------------------------------------------------------------------------------------------------|----------------------------------------------------------------------------------------------------------------------------------------------------------------------------------------------------------------------------------|-----------------------------------------------------------|--------------------------------------------------------------------------|
| Gulersen et al. 2020 [24]  | 50 | 24.25–33.75y/o, 38.45–40.1wks' gestation, with COVID-19 symptoms: 9 mild, 3 moderate, 2 severe, 1 critical disease. Delivered via 12CS, 38VD | 0–20 days prior delivery          | Not tested        | Signs of MVM: infarction ( <i>n</i> = 4), distal villous hypoplasia ( <i>n</i> = 2), increased perivillous fibrin ( <i>n</i> = 6), intervillous thrombosis ( <i>n</i> = 13), retroplacental thrombus ( <i>n</i> = 2), old haemorrhage in membranes ( <i>n</i> = 1), Signs of FVM ( <i>n</i> = 4), delayed villous maturation ( <i>n</i> = 10), chorangiomas ( <i>n</i> = 3). Inflammation: chorioamnionitis ( <i>n</i> = 9), villitis ( <i>n</i> = 2), chorionitis ( <i>n</i> = 11), fetal vasculitis ( <i>n</i> = 7). Others: meconium ( <i>n</i> = 9)                                                                                                                                              | NA                                                                                                                                                                                                                               | NA                                                        | BW: 2771–3435 g<br>All neonates tested -ve                               |
| ** Hecht et al. 2020 [25]  | 20 | 22–42y/o, 22–41+1wks' gestation, 2 sets of twins, 7 asymptomatic, 8 mild symptoms, 5 severe COVID-19. Delivered via 12CS, 8VD                | 9 days prior delivery to 1 day PP | IHC & ISH (3 +ve) | Placental weight: 54–797 g<br>Signs of MVM: infarction ( <i>n</i> = 2), increased perivillous fibrin deposition ( <i>n</i> = 2), decidual vasculopathy ( <i>n</i> = 3), intervillous / subchorionic thrombosis ( <i>n</i> = 4)<br>Signs of FVM: Chorangiomas ( <i>n</i> = 1), VSK ( <i>n</i> = 1), avascular villi ( <i>n</i> = 2). Inflammation: chorioamnionitis/subchorionitis ( <i>n</i> = 7), villitis ( <i>n</i> = 1), intervillitis ( <i>n</i> = 1), chronic deciduitis ( <i>n</i> = 2), choriovasculitis / fetal vasculitis ( <i>n</i> = 4). Others: meconium ( <i>n</i> = 5), villous oedema ( <i>n</i> = 2), hypercoiling cord ( <i>n</i> = 1), marginal insertion of cord ( <i>n</i> = 1) | (IHC) +ve SARS-CoV-2 on ST ( <i>n</i> = 2). (ISH) +ve SARS-CoV-2 on STs, CTs & decidual endothelial cells ( <i>n</i> = 3).<br>+ve ACE2 on STs, CTs and EVT. TMPSSR2 weak in villous endothelium & rarely in STs ( <i>n</i> = 10) | NA                                                        | BW: NA<br>One IUD (not tested), One neonate tested +ve                   |
| ** Hosier et al. 2020 [26] | 1  | 35y/o, G3P1, 22wks' gestation.                                                                                                               | +ve on admission                  | RT-PCR (+ve)      | Gross: marginal adherent blood clot associated with a focal placental infarct.<br>Histo: diffuse perivillous fibrin & histiocytic intervillitis.                                                                                                                                                                                                                                                                                                                                                                                                                                                                                                                                                     | (IHC & ISH) +ve SARS-CoV-2 S protein in STs                                                                                                                                                                                      | +ve virus particles within the cytosol of placental cells | Umbilical cord tested +ve & Neonate tested -ve.<br>Autopsy: unremarkable |
| ** Hsu et al. 2020 [27]    | 1  | 29y/o, multigravida, 40+4wks' gestation, with mild COVID-19 disease. Delivered via VD                                                        | 2 days prior delivery             | IHC (+ve)         | Gross: marginally inserted umbilical cord, 538g (60th percentile). Histo: hypertrophic arteriopathy & subchorionic                                                                                                                                                                                                                                                                                                                                                                                                                                                                                                                                                                                   | (IHC) +ve SARS-CoV-2 N protein in chorionic villi endothelial cells, rarely trophoblasts                                                                                                                                         | NA                                                        | BW: 3561g<br>Neonate tested -ve                                          |

|                              |                      |                                                                                                                    |                                             |                                |                                                                                                                                                                                                                                                                                                                                                                                                                                                                                                                                                                                                                                                                                                                                                                                                                     |                                                                                                                                                      |    |                                                                                                         |
|------------------------------|----------------------|--------------------------------------------------------------------------------------------------------------------|---------------------------------------------|--------------------------------|---------------------------------------------------------------------------------------------------------------------------------------------------------------------------------------------------------------------------------------------------------------------------------------------------------------------------------------------------------------------------------------------------------------------------------------------------------------------------------------------------------------------------------------------------------------------------------------------------------------------------------------------------------------------------------------------------------------------------------------------------------------------------------------------------------------------|------------------------------------------------------------------------------------------------------------------------------------------------------|----|---------------------------------------------------------------------------------------------------------|
|                              |                      |                                                                                                                    |                                             |                                |                                                                                                                                                                                                                                                                                                                                                                                                                                                                                                                                                                                                                                                                                                                                                                                                                     | laminar necrosis, chronic villitis, scattered islands of EVT                                                                                         |    |                                                                                                         |
| ** Kirstman et al. 2020 [28] | 1                    | 40y/o, G2P1, 35+5wks' gestation. Delivered by CS                                                                   | 1 day prior delivery                        | RT-PCR (+ve)                   | Chronic histiocytic intervillitis & extensive early infarction                                                                                                                                                                                                                                                                                                                                                                                                                                                                                                                                                                                                                                                                                                                                                      | CD68+ macrophages, CD3+ T cells, CD20+ B cells identified.                                                                                           | NA | BW: 2930 g<br>Neonate tested +ve                                                                        |
| Kuhr et al. 2020 [29]        | 1 (twins)            | 30y/o, G2P0+1, monochorionic diamniotic (MCDA) twin, 32+6wks' gestation. Delivered by CS                           | 2 days prior delivery                       | Not tested                     | Accelerated villous maturation & mild hypoperfusion                                                                                                                                                                                                                                                                                                                                                                                                                                                                                                                                                                                                                                                                                                                                                                 | NA                                                                                                                                                   | NA | BW: 2190 g & 2160 g<br>Both neonates tested -ve                                                         |
| Lokken et al. 2020 [30]      | 46 (only 1 examined) | 38y/o, G6P2, 38+5wks' gestation. Delivered by VD                                                                   | +ve on admission                            | RT-PCR (-ve)                   | SGA placenta (<5%), acute chorioamnionitis, mild funisitis, severe chronic villitis                                                                                                                                                                                                                                                                                                                                                                                                                                                                                                                                                                                                                                                                                                                                 | IHC for cytomegalovirus -ve                                                                                                                          | NA | Autopsy: no abnormalities<br>Neonate tested -ve                                                         |
| ** Menter et al. 2020 [31]   | 5                    | 27.6–39.7y/o, 39–40+5wk, with mild COVID-19 ( <i>n</i> = 3), asymptomatic ( <i>n</i> = 2). Delivered via 2CS, 3VD, | 4, 5, 18, 35 days prior delivery & 1 day PP | RT-PCR & ISH (+ve in one case) | Placenta weight: 526–649 g<br>Signs of MVM: infarction ( <i>n</i> = 2), increased perivillous/intervillous fibrin deposition ( <i>n</i> = 6), decidual vasculopathy ( <i>n</i> = 3), accelerated villous maturation ( <i>n</i> = 1), intervillous thrombosis ( <i>n</i> = 1)<br>Signs of FVM: thrombi in fetal circulation ( <i>n</i> = 2), delayed villous maturation ( <i>n</i> = 1), chorangioma ( <i>n</i> = 2). Inflammation: chronic villitis ( <i>n</i> = 2), chronic histiocytic intervillitis ( <i>n</i> = 1), chorioamnionitis/subchorionitis ( <i>n</i> = 3), chronic deciduitis ( <i>n</i> = 2), choriovasculitis / fetal vasculitis ( <i>n</i> = 3). Others: meconium ( <i>n</i> = 1), hypercoiling cord ( <i>n</i> = 3), marginal insertion of cord ( <i>n</i> = 1), placenta accreta ( <i>n</i> = 1) | (ISH) +ve SARS CoV-2 RNA in endothelial cells of decidua.<br>(IHC) weak +ve ACE2 in invasive EVT ( <i>n</i> = 4).<br>CD8+ T cells, CD68+ macrophages | NA | BW: 2790–3500 g,<br>Umbilical cord blood, breast milk, amniotic fluid tested -ve<br>No data on neonates |
| ** Mongula et al. 2020 [32]  | 1                    | 27y/o G2P1 @ 32+1wks' gestation. Delivered via CS                                                                  | +ve on admission                            | RT-PCR (+ve)                   | Placenta grossly normal. Histo: increase in perivillous fibrin (>30–40%) leading to trophoblast necrosis, reduced intervillous space possible infarction, extensive histiocytic & neutrophilic intervillitis                                                                                                                                                                                                                                                                                                                                                                                                                                                                                                                                                                                                        | (IHC) +ve SARS-CoV-2 in trophoblasts & stromal cells                                                                                                 | NA | BW: 1920 g (58th percentile)<br>Neonate tested -ve                                                      |

|                               |                       |                                                                                                               |                                    |                          |                                                                                                                                                                                                                                                                                                           |                                                                                                                                                                                 |    |                                                                                                                     |
|-------------------------------|-----------------------|---------------------------------------------------------------------------------------------------------------|------------------------------------|--------------------------|-----------------------------------------------------------------------------------------------------------------------------------------------------------------------------------------------------------------------------------------------------------------------------------------------------------|---------------------------------------------------------------------------------------------------------------------------------------------------------------------------------|----|---------------------------------------------------------------------------------------------------------------------|
| Mulvey et al. 2020 [33]       | 5                     | 26–40y/o, 38–40wks' gestation, with fever ( $n = 2$ ), others asymptomatic ( $n = 3$ )<br>Delivered 4VD, 1 CS | All +ve intrapartum                | IHC & ISH (-ve)          | Signs of FVM: thrombosis in larger vessels in the fetal circulation ( $n = 5$ ), intramural fibrin ( $n = 4$ ), VSK ( $n = 1$ ), chorangiomas ( $n = 1$ ), avascular villi ( $n = 1$ ), Signs of MVM: perivillous fibrin ( $n = 1$ ), others: furcate insertion of cord ( $n = 1$ ), meconium ( $n = 3$ ) | (IHC) -ve SARS-CoV-2 S protein & (ISH) -ve viral RNA in placenta<br>+ve Complement staining C3d, C4d, C5b-9 in decidua, villi & perivillous fibrin (no different with controls) | NA | No data on neonatal outcome                                                                                         |
| Ozer et al. 2020 [34]         | 1                     | 37y/o, G2P1, 39wks' gestation, with mild COVID-19 symptoms                                                    | +ve on admission                   | Not tested               | Gross: $18 \times 17 \times 2.5$ cm, 564g (75 <sup>th</sup> percentile), subchorionic fibrin on fetal surface. Histo: low grade villitis of unknown etiology, chronic deciduitis & avascular villi adjacent to a subchorionic thrombosis                                                                  | (IHC) CD163+ macrophages, CD4+ lymphocytes,                                                                                                                                     | NA | BW: 3360 g<br>Neonate tested -ve                                                                                    |
| ** Patane et al. 2020 [35]    | 22 (only 2 examined)  | 35.1 & 37.6wks of gestation, with fever & cough. Delivered by CS (for nonreassuring fetal status), VD         | +ve intrapartum                    | ISH (2 +ve)              | Chronic histiocytic intervillitis                                                                                                                                                                                                                                                                         | (ISH) both +ve SARS-CoV-2 S protein in STs, (IHC) CD68+ macrophages                                                                                                             | NA | BW: 2686 g, 2660 g<br>One neonate tested +ve (at birth)                                                             |
| Prabhu et al. 2020 [36]       | 70 (only 29 examined) | 26.1–37.2y/o, 37.4–39.9wks' gestation, COVID-19 symptoms ( $n = 15$ ). Delivered via 32CS, 38VD               | +ve on admission                   | Not tested               | Signs of MVM ( $n = 8$ ), Signs of FVM ( $n = 14$ ), Inflammation: chronic villitis ( $n = 5$ ), maternal response ( $n = 1$ ), maternal & fetal response ( $n = 2$ ), Others: meconium ( $n = 18$ ), cord abnormalities ( $n = 1$ )                                                                      | NA                                                                                                                                                                              | NA | BW: 3211.08 g (mean)<br>1 stillbirth.<br>All neonates tested -ve                                                    |
| ** Pulinx et al. 2020 [37]    | 1 (twins)             | 30y/o, G2P1, 24wks' gestation, DCDA twin.. Delivered via VD                                                   | 2 wks prior delivery               | RT-PCR (+ve) & IHC (+ve) | Extensive intervillous fibrin deposition, ischaemic necrosis of surrounding villi, chronic histiocytic intervillitis, nuclear debris within fetal circulation & increased in erythroblasts                                                                                                                | (IHC) +ve SARS-CoV-2 in STs<br>(IHC) CD3+, CD8+ T lymphocytes, CD68+ macrophages                                                                                                | NA | 1 IUD, 1 prepartal death, AF tested +ve, amniotic sac tested -ve,<br>Neonates not tested                            |
| ** Richtmann et al. 2020 [38] | 5                     | 24–40y/o, 21+1 to 38+3wks' gestation, with mild to moderate COVID-19 diseases. Delivered via 2CS, 3VD         | +ve from 1 -22 days prior delivery | RT-PCR (+ve in 2 cases)  | Signs of MVM: Increased in intervillous fibrin ( $n = 2$ ), subchorionic thrombosis ( $n = 1$ ), Inflammation: chorioamnionitis ( $n = 5$ ), acute villitis ( $n = 2$ ), acute intervillitis ( $n = 2$ ), acute deciduitis ( $n = 2$ )                                                                    | NA                                                                                                                                                                              | NA | All 5 stillbirths.<br>BW: 329–2895 g<br>Autopsy (one case): no abnormalities,<br>Neonates not tested for SARS-CoV-2 |

|                            |    |                                                                                                                                                                             |                                               |                 |                                                                                                                                                                                                                                                                                                                                                                                                                                                                                                                                                                                                                                                                                                                             |                                                                        |                                                                                                                             |                                                   | AF +ve (in one case) |
|----------------------------|----|-----------------------------------------------------------------------------------------------------------------------------------------------------------------------------|-----------------------------------------------|-----------------|-----------------------------------------------------------------------------------------------------------------------------------------------------------------------------------------------------------------------------------------------------------------------------------------------------------------------------------------------------------------------------------------------------------------------------------------------------------------------------------------------------------------------------------------------------------------------------------------------------------------------------------------------------------------------------------------------------------------------------|------------------------------------------------------------------------|-----------------------------------------------------------------------------------------------------------------------------|---------------------------------------------------|----------------------|
| Shanes et al. 2020 [39]    | 16 | 23–41y/o, 16–40wks' gestation.<br>Delivery method: NA                                                                                                                       | 0, 1, 2, 7, 25, 28,<br>34 days prior delivery | Not tested      | Placenta weight: 298–612 g<br>Signs of MVM: Infarction ( $n = 4$ ), accelerated villous maturation ( $n = 2$ ), increased fibrin deposition ( $n = 3$ ), intervillous thrombosis ( $n = 6$ ), villous agglutination ( $n = 3$ ), decidual vasculopathy ( $n = 7$ ), retroplacental haematoma ( $n = 1$ ).<br>Signs of FVM: intramural fibrin ( $n = 1$ ), avascular villi ( $n = 4$ ), delayed villous maturation ( $n = 4$ ), chorangiomas ( $n = 4$ ). Inflammation: chorioamnionitis ( $n = 1$ ), fetal vasculitis ( $n = 1$ ), chronic deciduitis ( $n = 2$ ), chronic villitis ( $n = 2$ ). Others: hypercoiling of cord ( $n = 1$ ), accreta ( $n = 2$ ), villous oedema ( $n = 4$ ), nucleated red cells ( $n = 1$ ) | NA                                                                     | NA                                                                                                                          | 1 IUD, 5 SGA,<br>1 LGA<br>All neonates tested -ve |                      |
| ** Sisman et al. 2020 [40] | 1  | 37y/o, G4P3, 34wks' gestation.<br>Delivered via VD                                                                                                                          | 3 days prior delivery                         | IHC & TEM (+ve) | Large for gestational age, patchy chronic histiocytic intervillitis, villitis associated with VSK & necrosis, focal basal chronic villitis, focal parabasal infarct, & features of meconium exposure in the fetal membranes                                                                                                                                                                                                                                                                                                                                                                                                                                                                                                 | (IHC) +ve SARS-CoV-2 N protein in STs<br>(IHC) CD68+ve macrophages     | 89–129 nm diameter structures, consistent with viral particles, clustered within membrane bound cisternal spaces in the STs | BW: 3280 g,<br>Neonate tested +ve                 |                      |
| Smithgall et al. 2020 [41] | 51 | 19–47y/o,<br>< 37wks' gestation ( $n = 10$ ), $\geq 37$ wks' gestation ( $n = 41$ ), majority had mild COVID-19 symptoms, 4 had severe disease.<br>Delivered via 25CS, 26VD | +ve on admission                              | IHC & ISH (-ve) | Signs of MVM: Infarction ( $n = 7$ ), accelerated villous maturation ( $n = 10$ ), villous agglutination ( $n = 21$ ), decidual vasculopathy ( $n = 3$ ), intervillous thrombosis ( $n = 8$ ), subchorionic thrombosis ( $n = 9$ ).<br>Signs of FVM: thrombi in fetal circulation ( $n = 4$ ), avascular villi ( $n = 5$ ), chorangiomas ( $n = 8$ ).<br>Inflammation: maternal response ( $n = 17$ ), fetal response ( $n = 9$ ),                                                                                                                                                                                                                                                                                          | (IHC) -ve SARS-CoV-2 S protein & (ISH) -ve viral S protein in placenta | NA                                                                                                                          | All neonates tested -ve                           |                      |

|                              |    |                                                                               |                       |                                             |                                                                                                                                                                                                                                                                                                                                                                                                                            |                                                                                                          |                                                                                  |
|------------------------------|----|-------------------------------------------------------------------------------|-----------------------|---------------------------------------------|----------------------------------------------------------------------------------------------------------------------------------------------------------------------------------------------------------------------------------------------------------------------------------------------------------------------------------------------------------------------------------------------------------------------------|----------------------------------------------------------------------------------------------------------|----------------------------------------------------------------------------------|
|                              |    |                                                                               |                       |                                             | chronic villitis ( $n = 2$ ), No significant different from controls except villous agglutination & subchorionic thrombi                                                                                                                                                                                                                                                                                                   |                                                                                                          |                                                                                  |
| ** Taglauer et al. 2020 [42] | 15 | 31.8y/o (mean age), 38.1wks' mean gestation age, no further clinical data     | +ve intrapartum       | IHC & ISH (all +ve)                         | Placental weight: 323–794 g<br>Signs of MVM: Infarction ( $n = 5$ ), increased fibrin deposition ( $n = 7$ ), hypoplastic villi ( $n = 1$ ), Inflammation: chorioamnionitis ( $n = 2$ ), subchorionitis ( $n = 5$ ), chronic villitis ( $n = 1$ ), fetal choriovasculitis ( $n = 1$ ), Others: meconium ( $n = 8$ ), hypercoiling of cord ( $n = 3$ ). No significant different from controls                              | (IHC & ISH) +ve SARS-CoV-2 S protein in STs & intermittent in CTs (ISH) ACE2 +ve in STs & TMPRSS2<br>-ve | NA<br>BW: 3319.9 g (mean)<br>5 neonates tested +ve (< 24 hours)                  |
| **Vivanti et al. 2020 [43]   | 1  | 23 y/o, G1P0, 35+2wks' gestation, with fever and severe cough & expectoration | 3 days prior delivery | RT-PCR & IHC (+ve)                          | Gross: Perivillous fibrin deposition with infarction, as irregular strands of pale yellow-white induration.<br>Histo: Diffuse perivillous fibrin deposition with infarction & acute and chronic intervillitis                                                                                                                                                                                                              | (IHC) +ve SARS-CoV-2 N protein in perivillous trophoblasts<br>(IHC) -ve Parvovirus & CMV                 | NA<br>BW: 2540 g, AF & neonate tested +ve, complicated with neurological deficit |
| ** Zhang et al. 2020 [44]    | 74 | 38–40wks' gestation. Delivered via 20CS, 54VD                                 | Likely upon admission | ISH (+ve in 2 cases of 53 placentas tested) | Signs of MVM: Infarction ( $n = 7$ ), decidual vasculopathy ( $n = 36$ ), retroplacental haemorrhage ( $n = 3$ ), massive fibrin deposition ( $n = 2$ ), Signs of FVM: thrombi in fetal circulation ( $n = 18$ ), avascular villi ( $n = 5$ ), Inflammation: chorioamnionitis ( $n = 48$ ), villitis ( $n = 17$ ), Others: meconium ( $n = 24$ ), hypercoiling of cord ( $n = 3$ ). No significant different from controls | (ISH) +ve SARS-CoV-2 in STs & endometrial glands (IHC) CD68+ macrophages, CD42b+ platelet aggregates     | NA<br>One neonate tested +ve                                                     |

\* Neonate(s) COVID-19 status within 24 h of birth; \*\* Cases with SARS-CoV-2-infected/positive placentas (total cases,  $n = 36$ ). Abbreviations: AF: amniotic fluid, BW: birth weight, CS: Caesarean section, CT: cytotrophoblasts, DCDA: dichorionic diamniotic, EVT: extravillous trophoblasts, FVM: fetal vascular malperfusion, G: gravida, histo: histopathology, IHC: immunohistochemistry, ISH: in situ hybridisation, IUD: intrauterine death, LGA: large for gestational age, MVM: maternal vascular malperfusion, N protein: nucleocapsid protein, NA: not available, -ve: negative, +ve: positive, P: para, PD-L1: programmed death-ligand 1, PP: postpartum, RNA: ribonucleic acid, RT-PCR: Reverse transcription-polymerase chain reaction, S protein: spike protein, SGA: small for gestational age, ST: syncytiotrophoblasts, TEM: transmission electron microscopy, VD: vaginal delivery, VSK: villous stromal-vascular karyorrhexis, wks: weeks, y/o: year-old.
